# Supplementary material
Source: PubMed Central journal article supplement (PMC5029757)

# Respiratory Syncytial Virus and Bronchiolitis

**Giovanni Piedimonte, M.D.**  
**Miriam K. Perez, M.D.**

# Respiratory Syncytial Virus

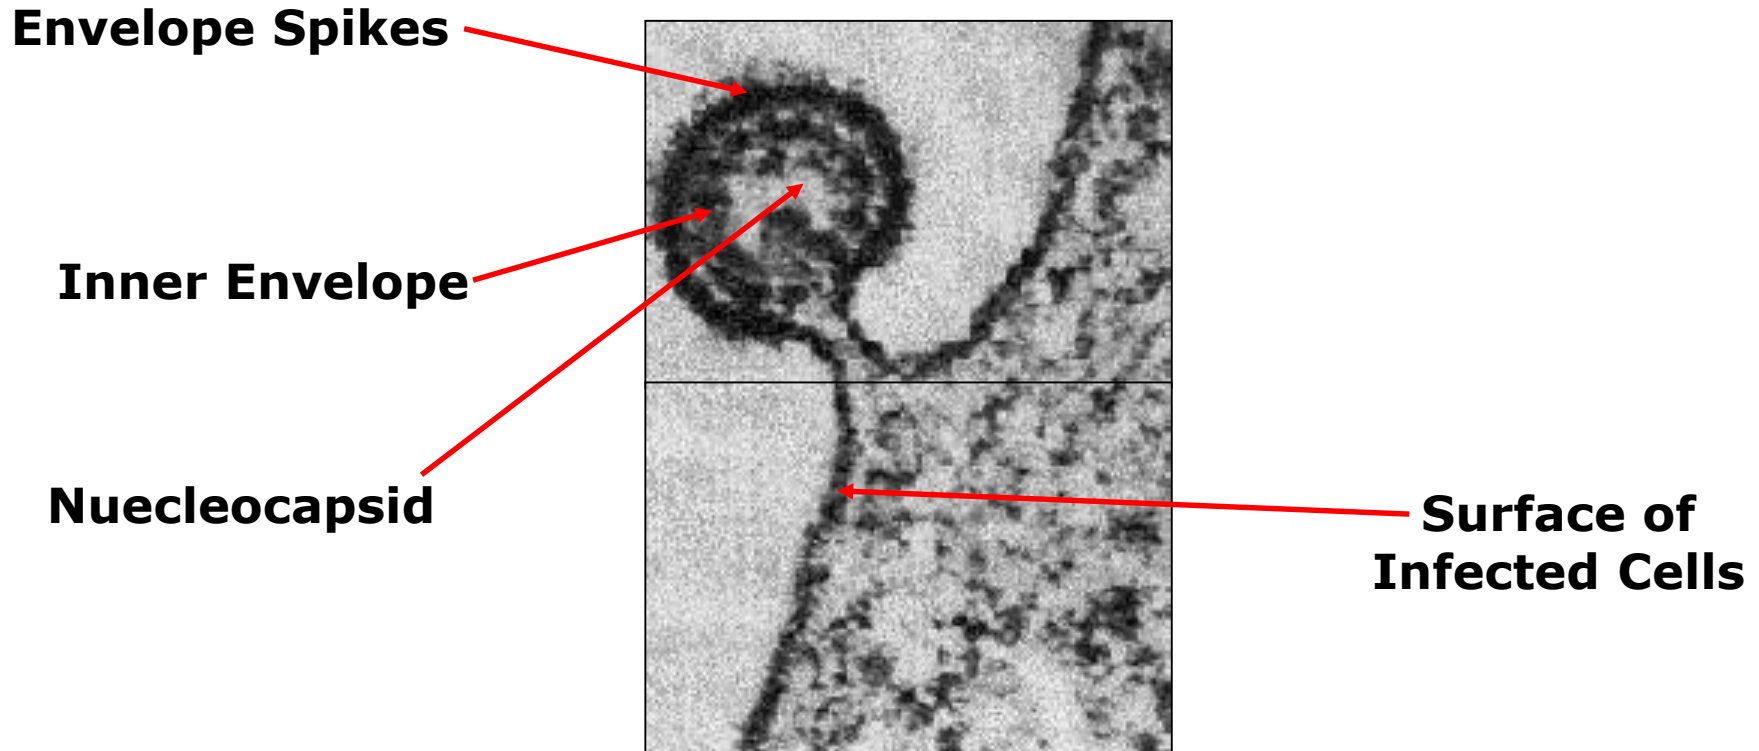

Electron photomicrograph of budding virion  
(Adapted from: Peter Collins, 1989; *Fields Virology* 2nd Edition, 1990).

# *Paramyxoviridae*

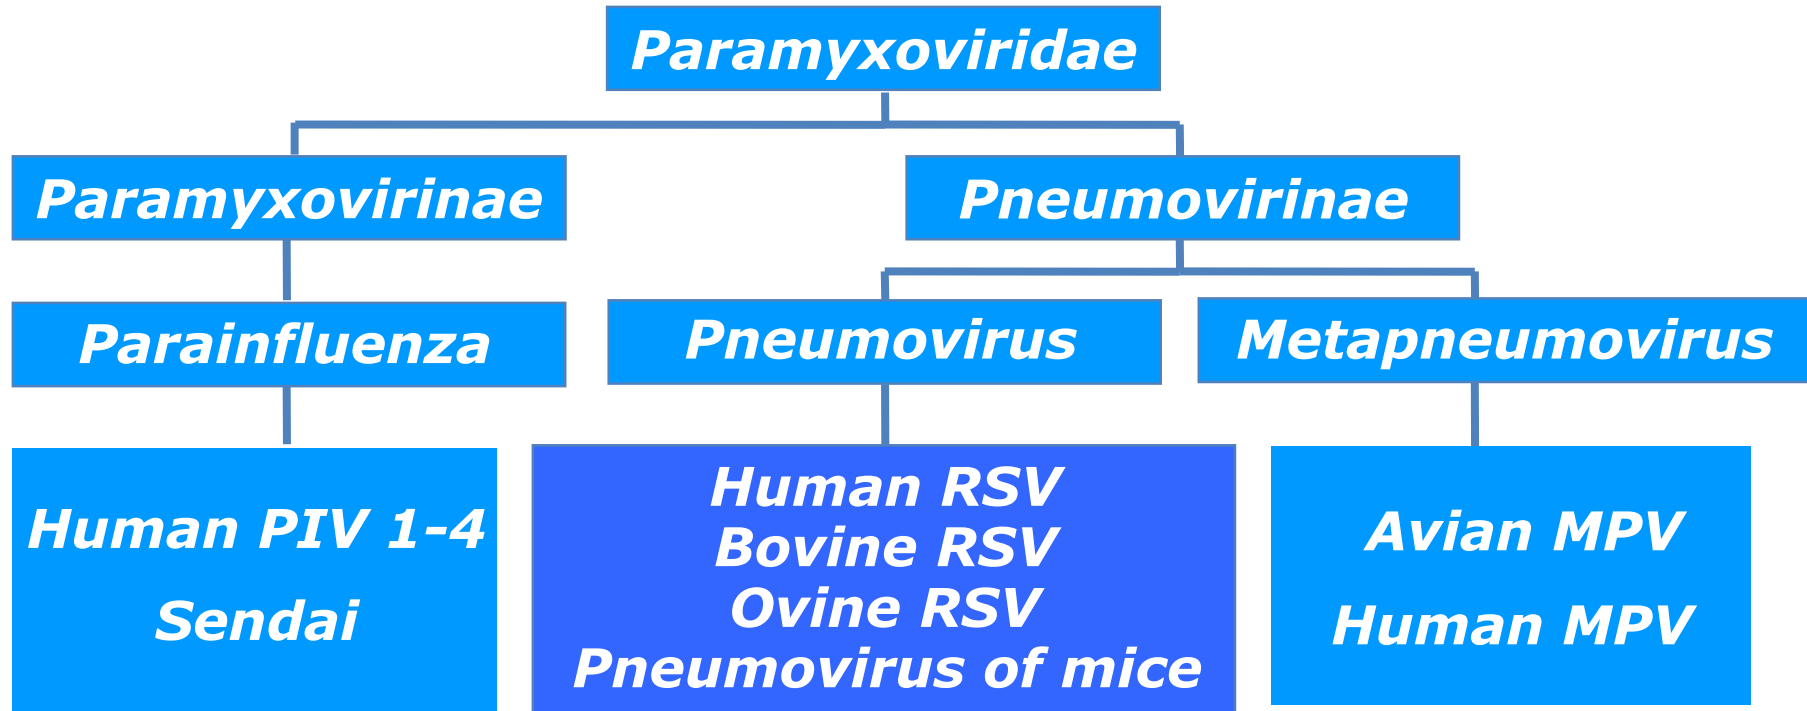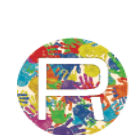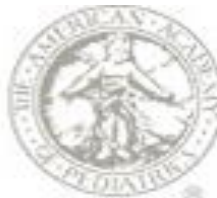

# RSV: The Most Common Respiratory Pathogen in Children Worldwide

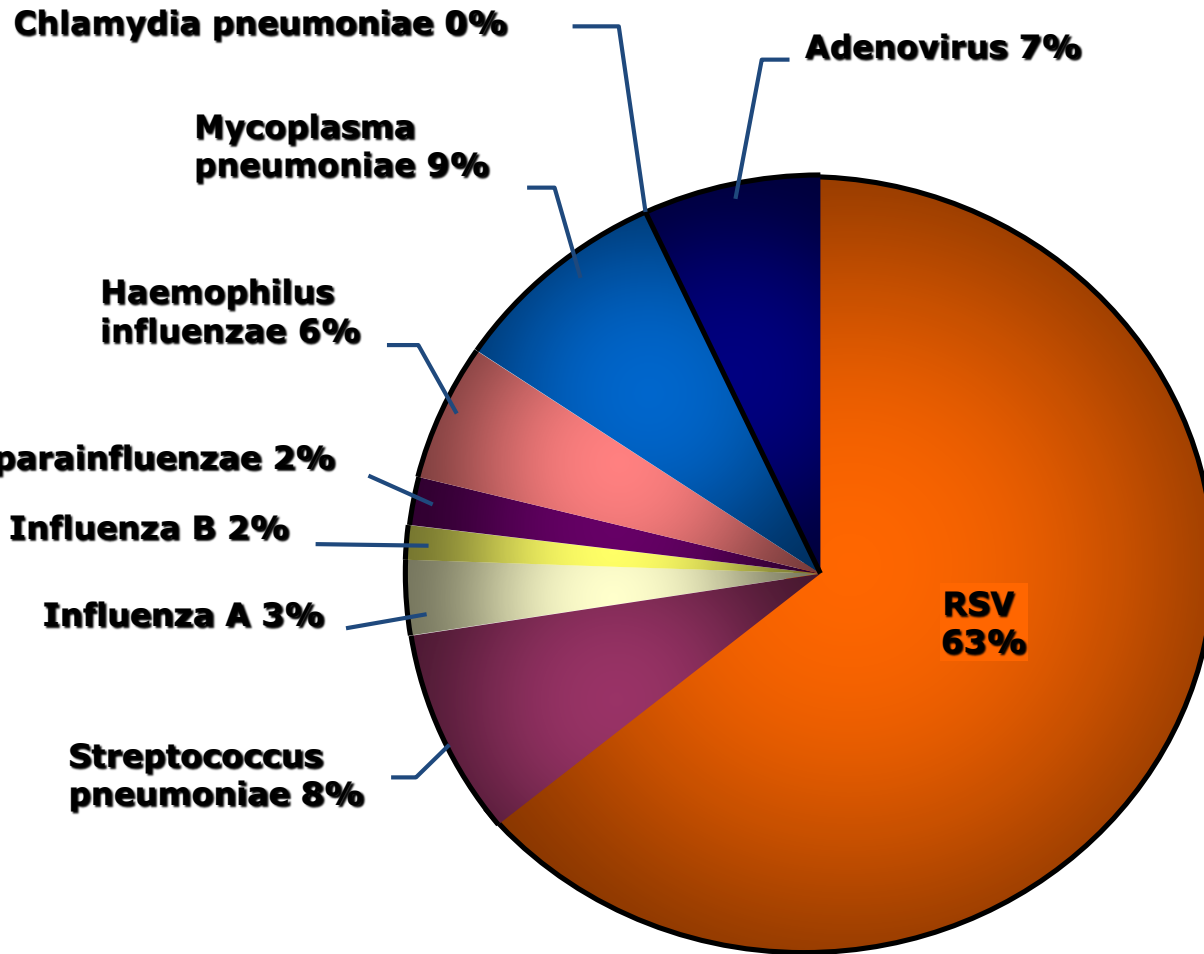

## RSV accounts for:

- >60% of ARIs during entire respiratory season
- 90% of ARIs at peak of respiratory season
- 80% of ARIs in infants <1 year old during entire respiratory season

ARI = acute respiratory infection.

Celebrating  
35 Years

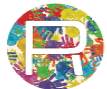

**Pediatrics in Review**

An Official Journal of the American Academy of Pediatrics

Piedimonte & Perez, PIR 2014

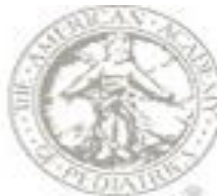

# Global Seasonality of RSV

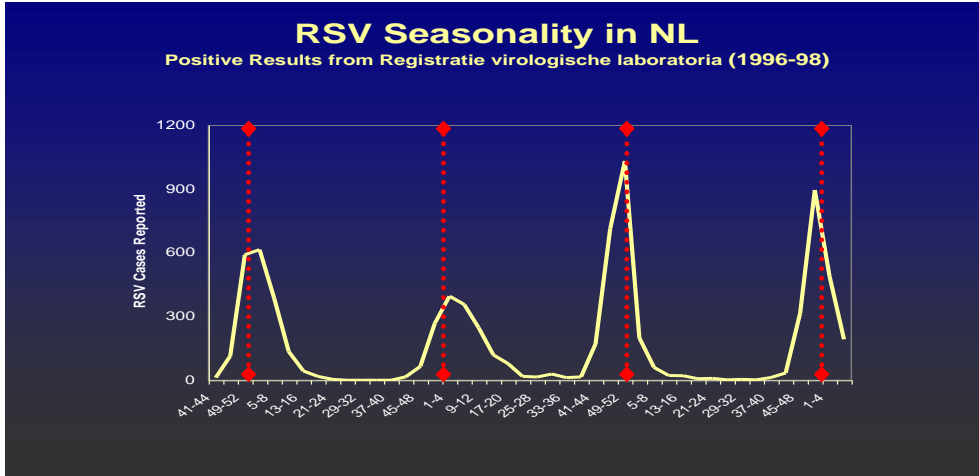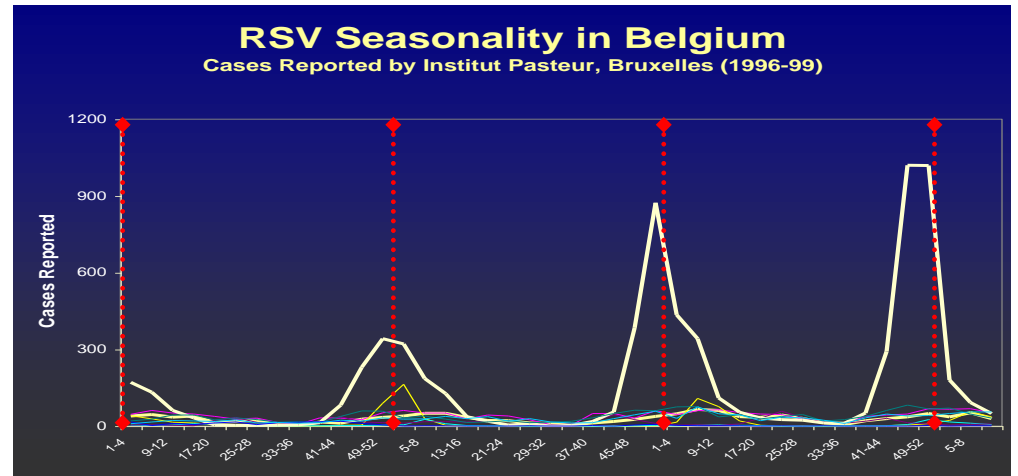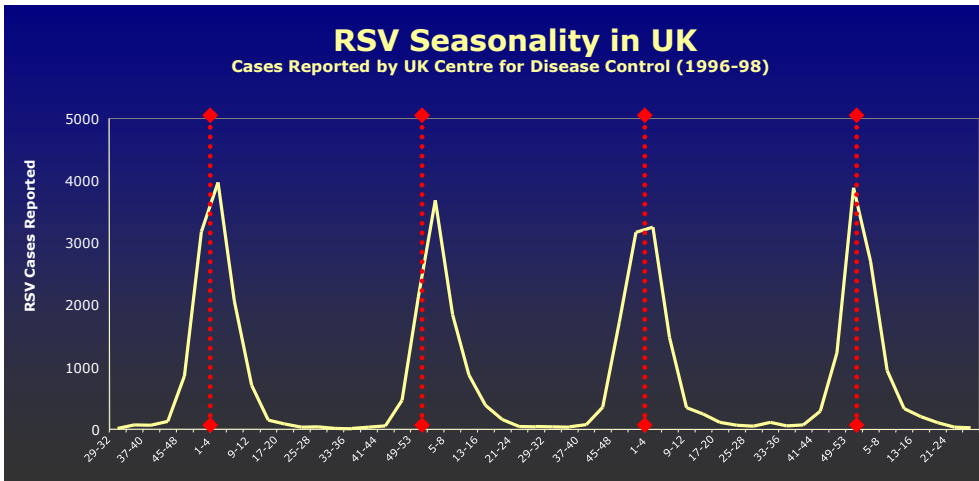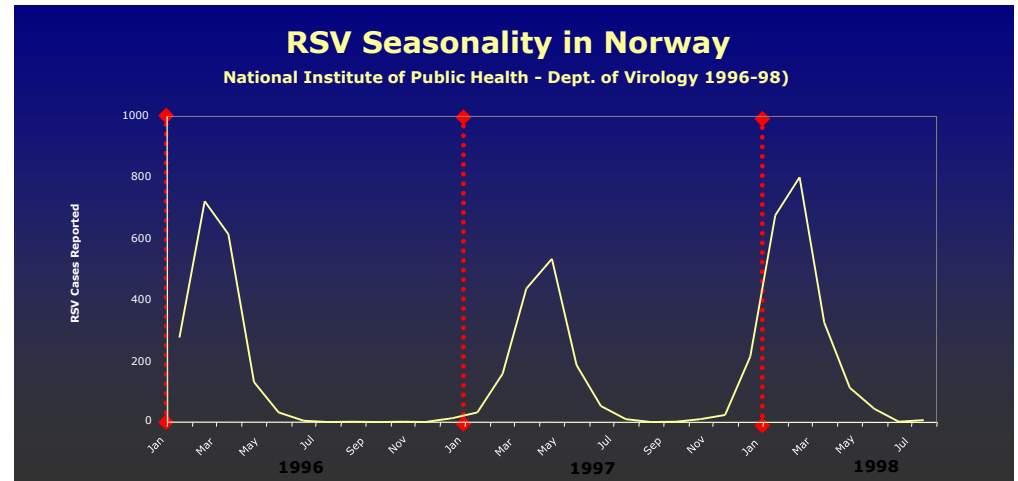

Celebrating 35 Years

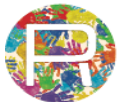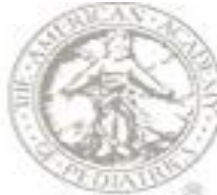

# Annual Bronchiolitis Hospitalizations Among US Children

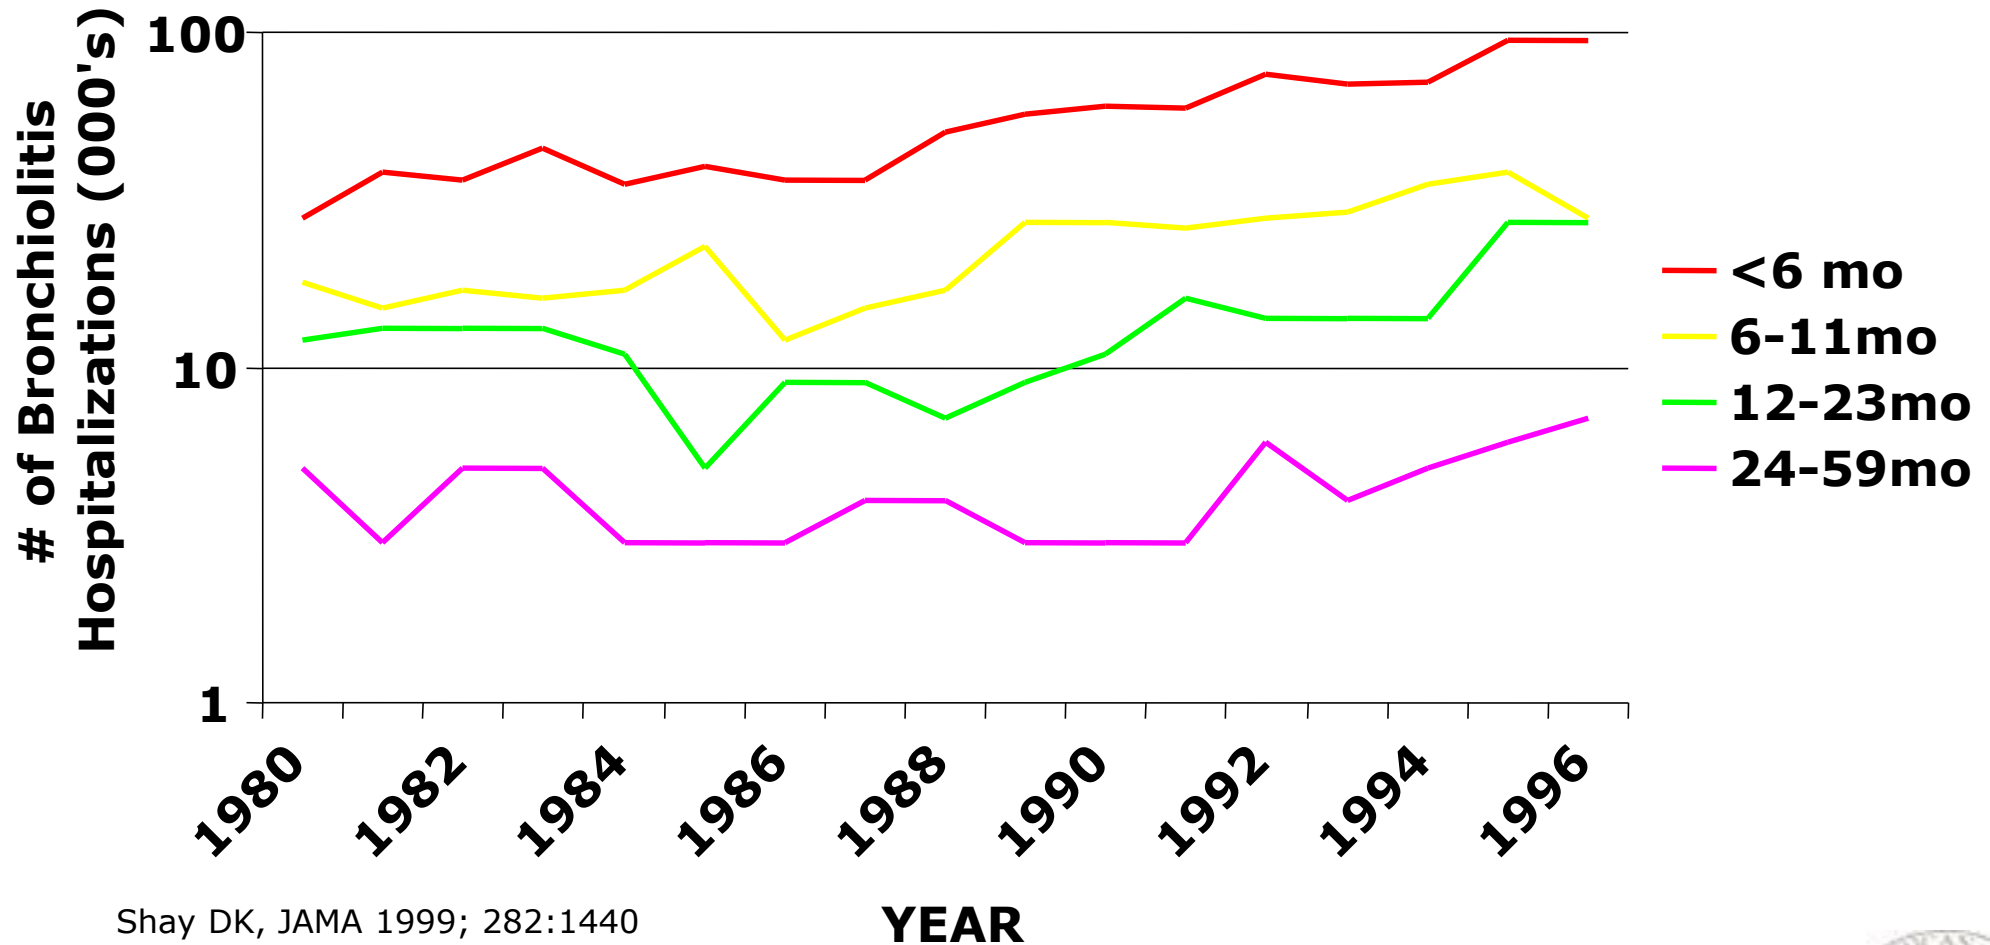

Shay DK, JAMA 1999; 282:1440

YEAR

Celebrating  
35  
Years

 **Pediatrics in Review**

An Official Journal of the American Academy of Pediatrics

Piedimonte & Perez, PIR 2014



# RSV Epidemiology

- **>120,000 annual hospitalizations in US**
- **Peak incidence of severe illness 2-3 months**
- **Illness severity related to:**
  - **Age <12 weeks**
  - **Absence of breastfeeding**
  - **History of prematurity**
  - **Underlying heart or lung disease**
  - **Immune deficit**

# RSV: Radiologic Findings

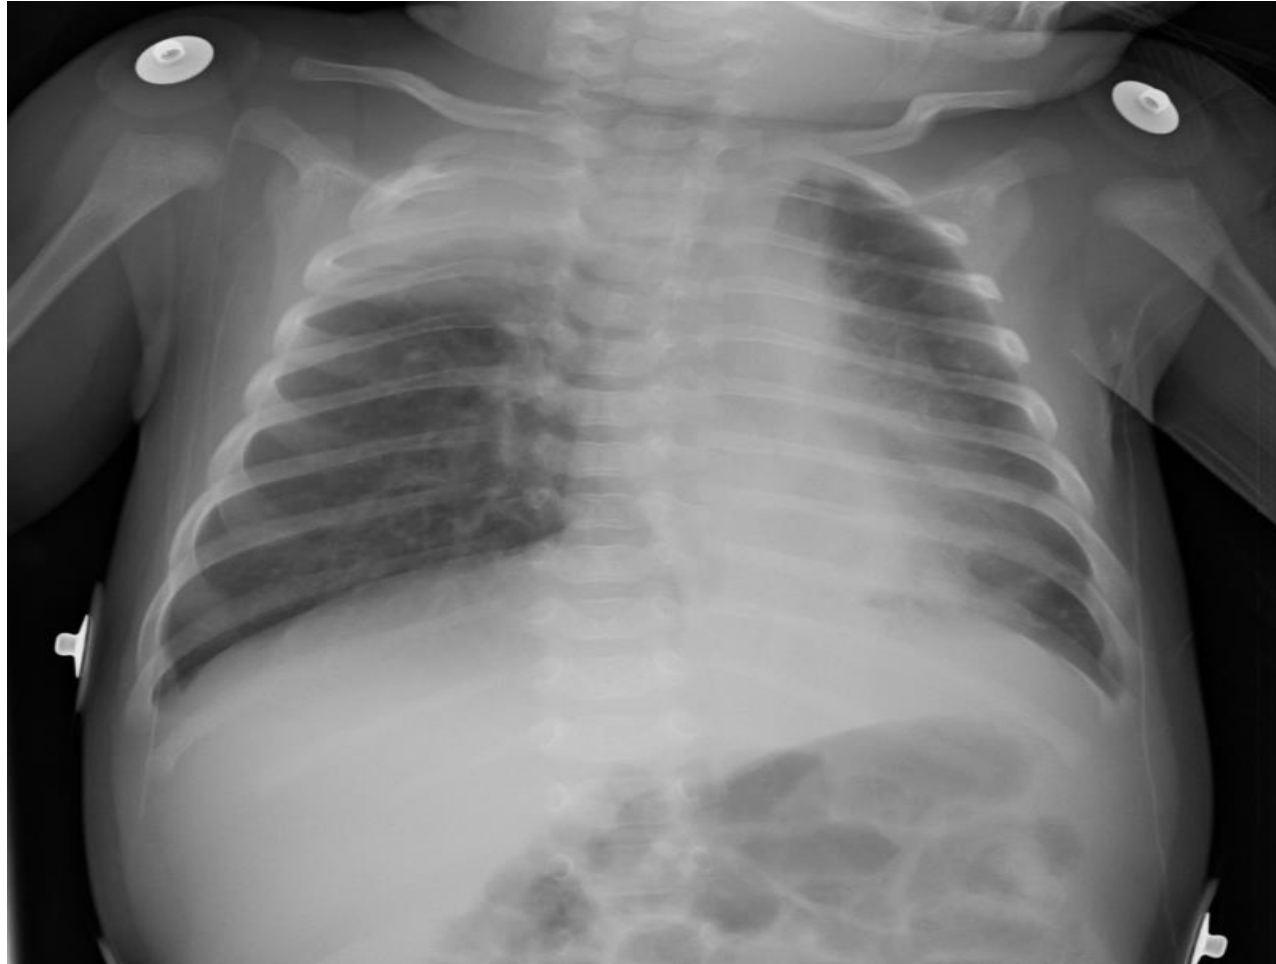



# Time Course of Post-RSV Recurrent Respiratory Symptoms

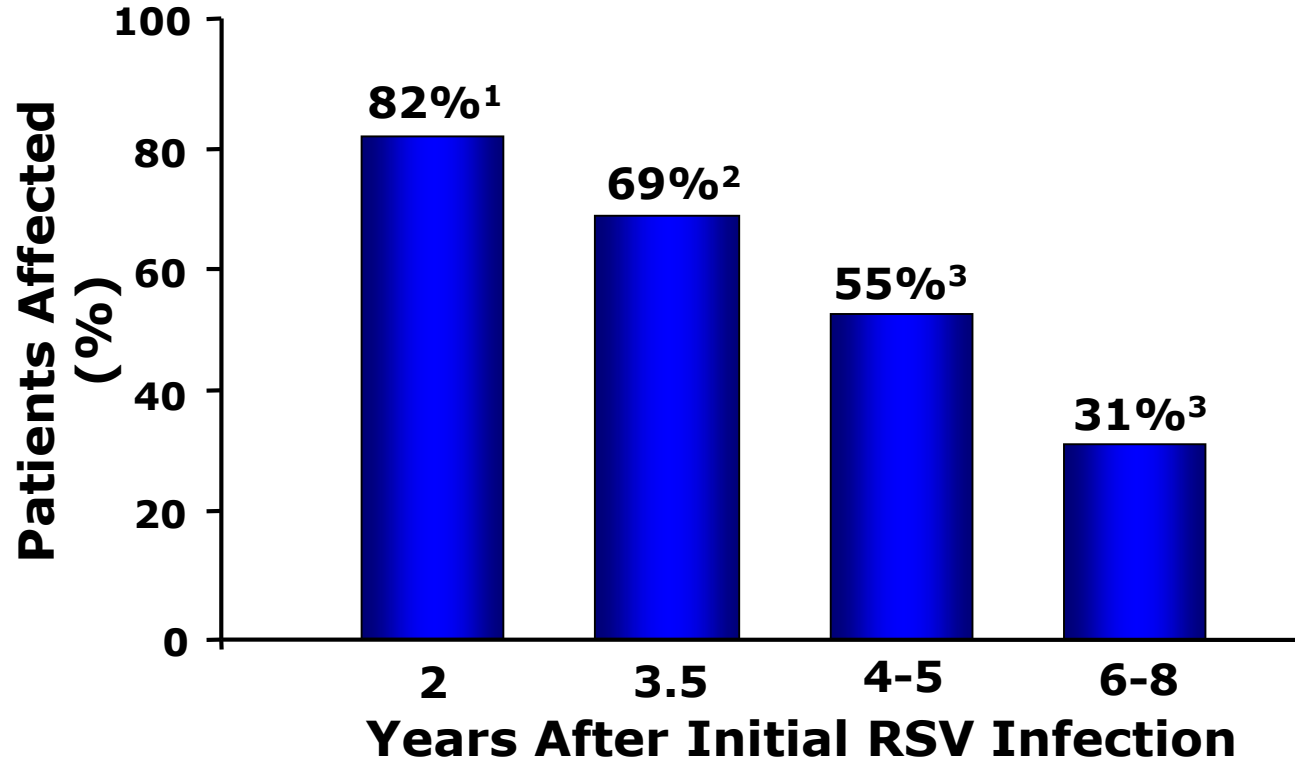

1. Henry RL et al. *Arch Dis Child* 1983; 58:713-716.
2. Webb MS et al. *Arch Dis Child* 1985; 60:1064-1067.
3. Hall CB et al. *J Pediatr* 1984;105:358-364.

Celebrating  
35  
Years

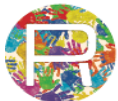

**Pediatrics in Review**  
An Official Journal of the American Academy of Pediatrics

Piedimonte & Perez, PIR 2014



# Current Bronchiolitis Management

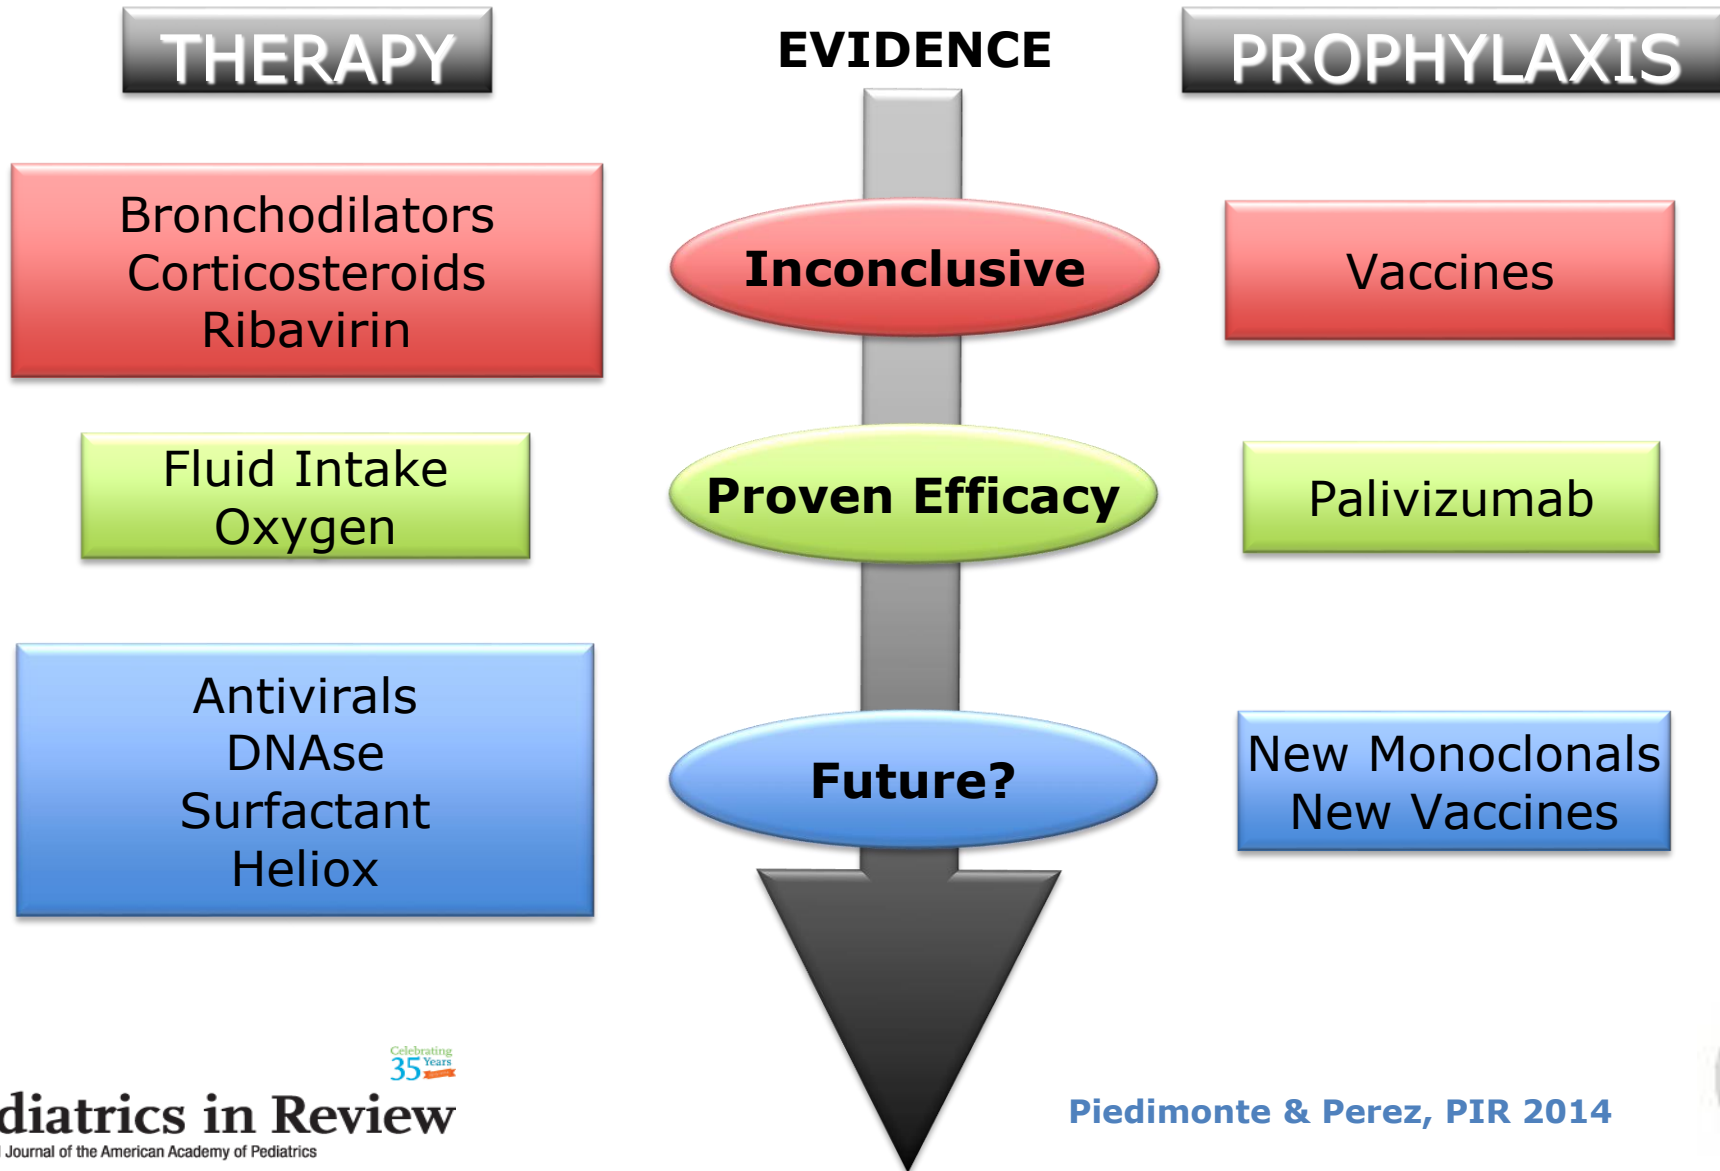

Supplement: supp_35.12.519_RSV_PIR_2014_Power_Point.pdf [file supp_35.12.519_RSV_PIR_2014_Power_Point.pdf]
